# Supplementary material for: Exploration on the drug solubility enhancement in aqueous medium with the help of endo-functionalized molecular tubes: a computational approach
Source: Royal Society of Chemistry journal article supplement (doi:10.1039/d1cp01187a), 2021-01-01
Supplement: d1cp01187a1.pdf [file d1cp01187a1.pdf]

## Supporting Information for

# Exploration on the Drug Solubility Enhancement in Aqueous Medium with the Help of Endo-Functionalized Molecular Tubes: A Computational Approach

Rabindranath Paul and Sandip Paul\*

*Department of Chemistry, Indian Institute of Technology, Guwahati, Assam 781039, India*

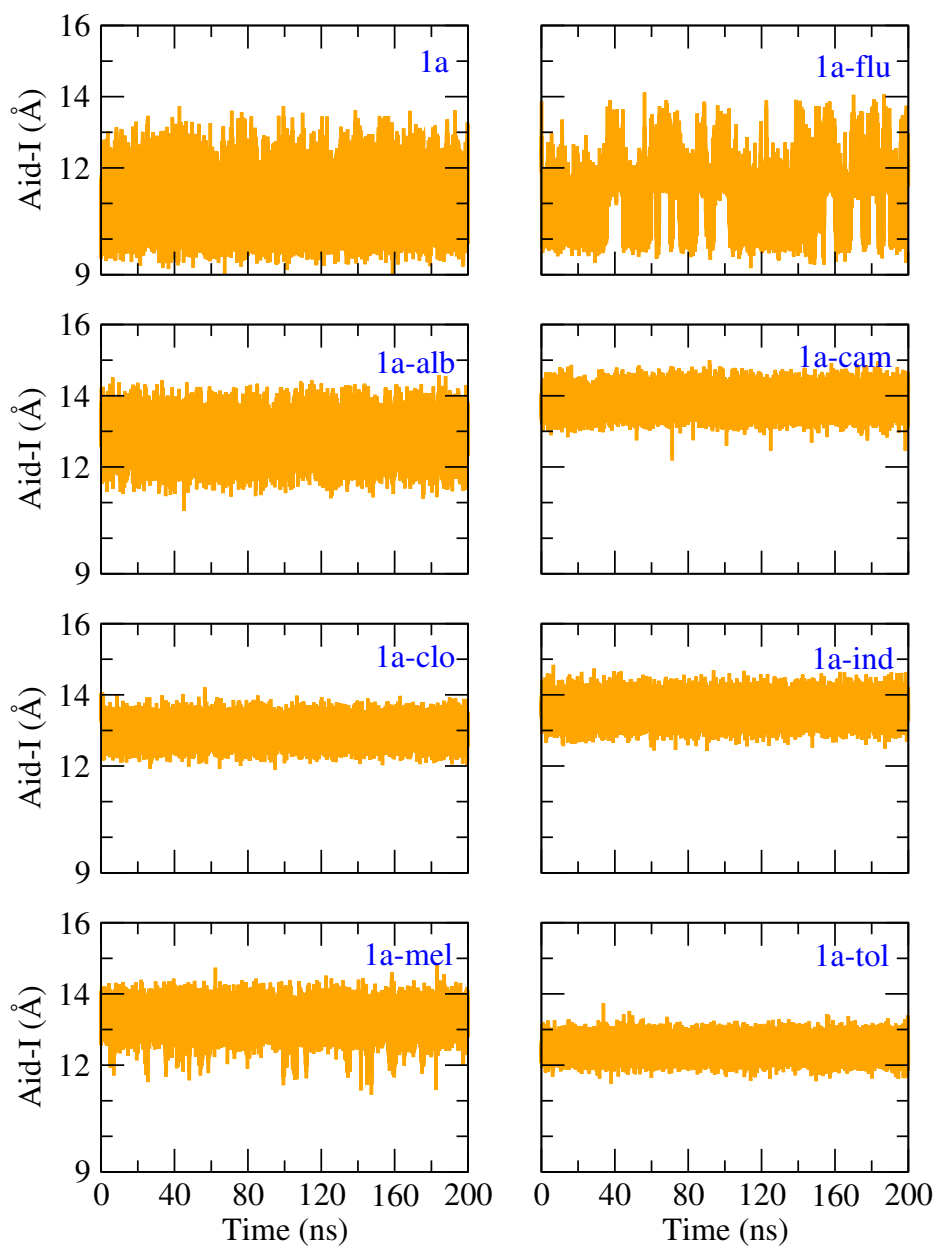

FIG. S1: Diameter-I (Aid-I) of host-1a as a function of simulation time of all the systems.

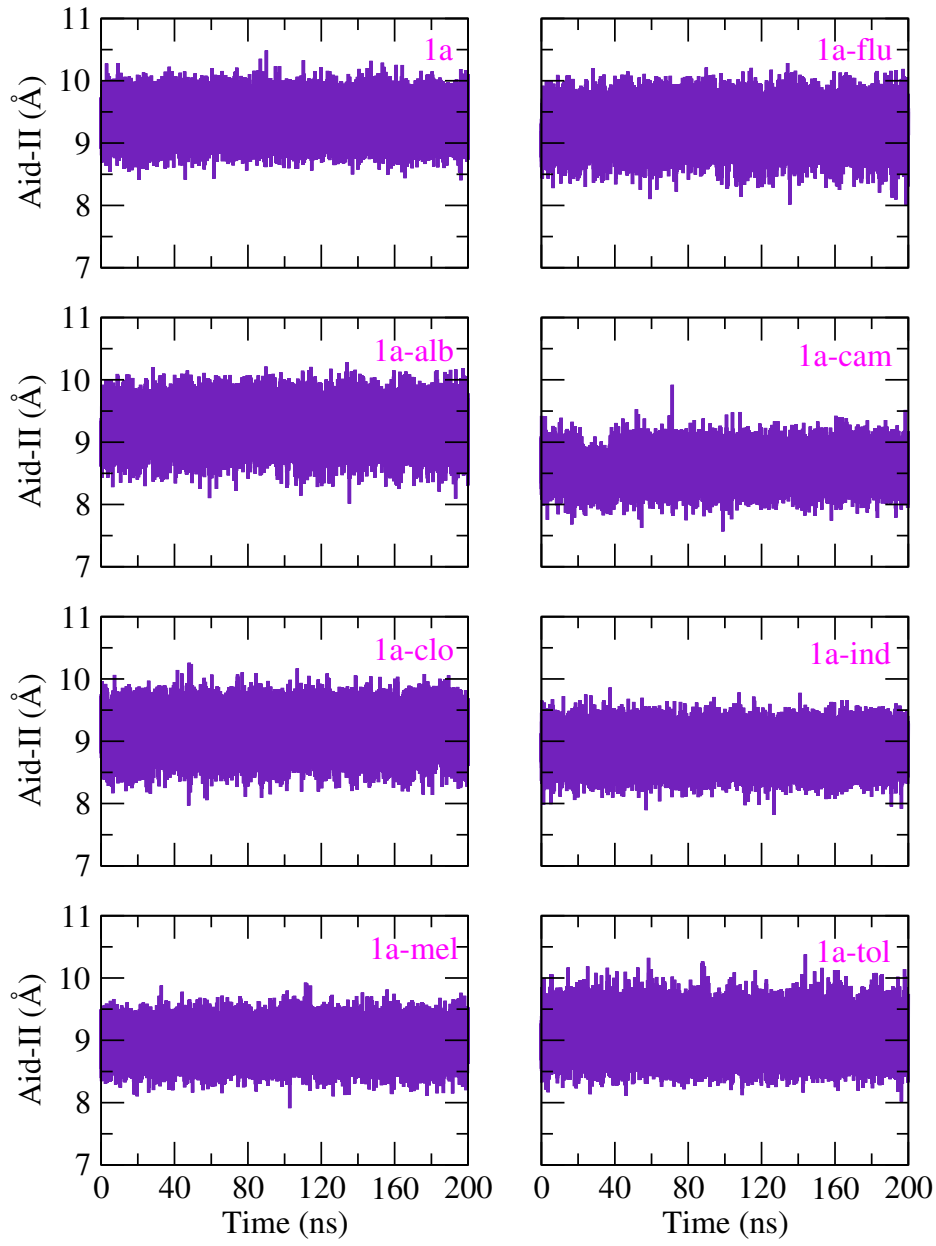

FIG. S2: Diameter-II (Aid-II) of host-1a as a function of simulation time of all the systems.

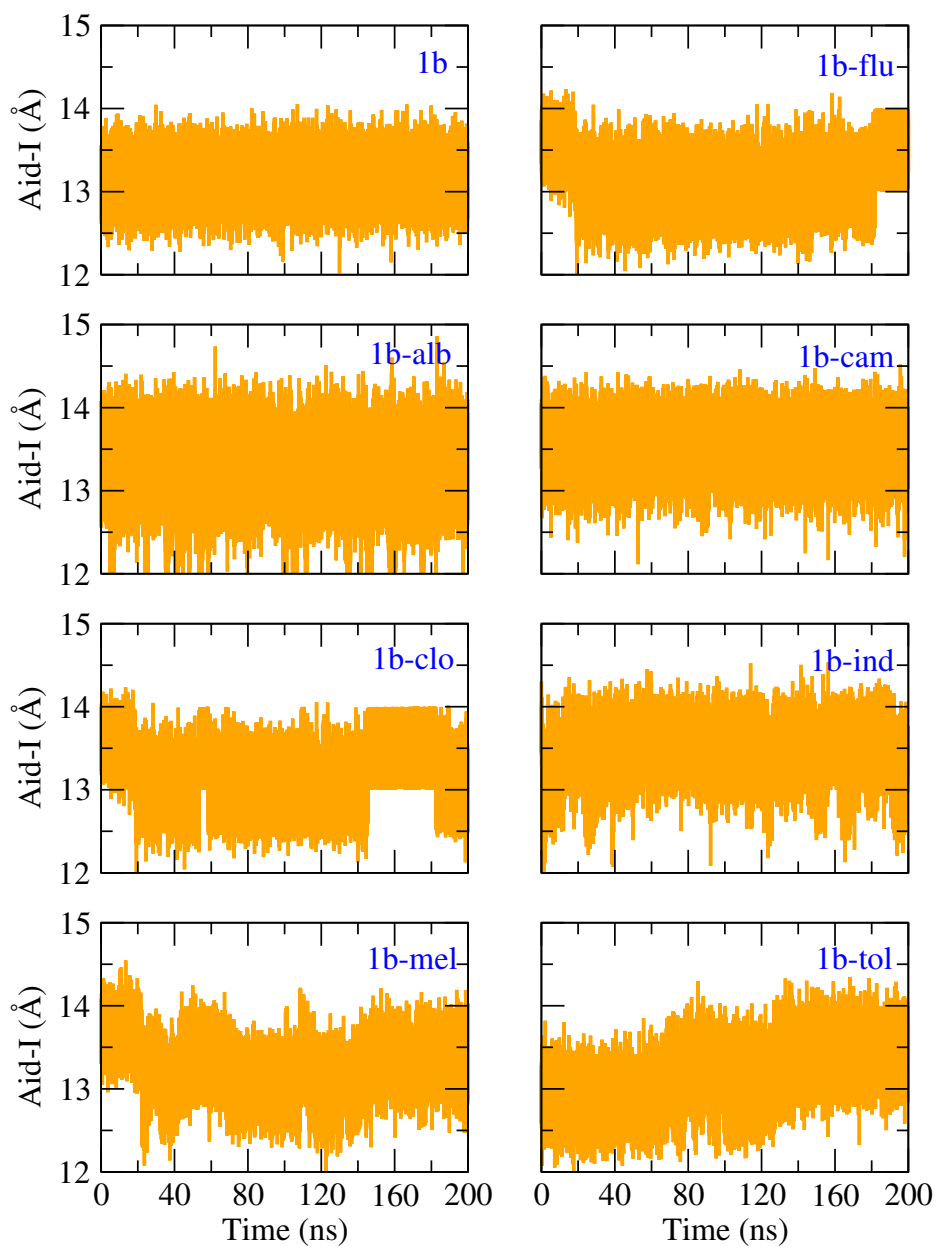

FIG. S3: Diameter-I (Aid-I) of host-1b as a function of simulation time of all the systems.

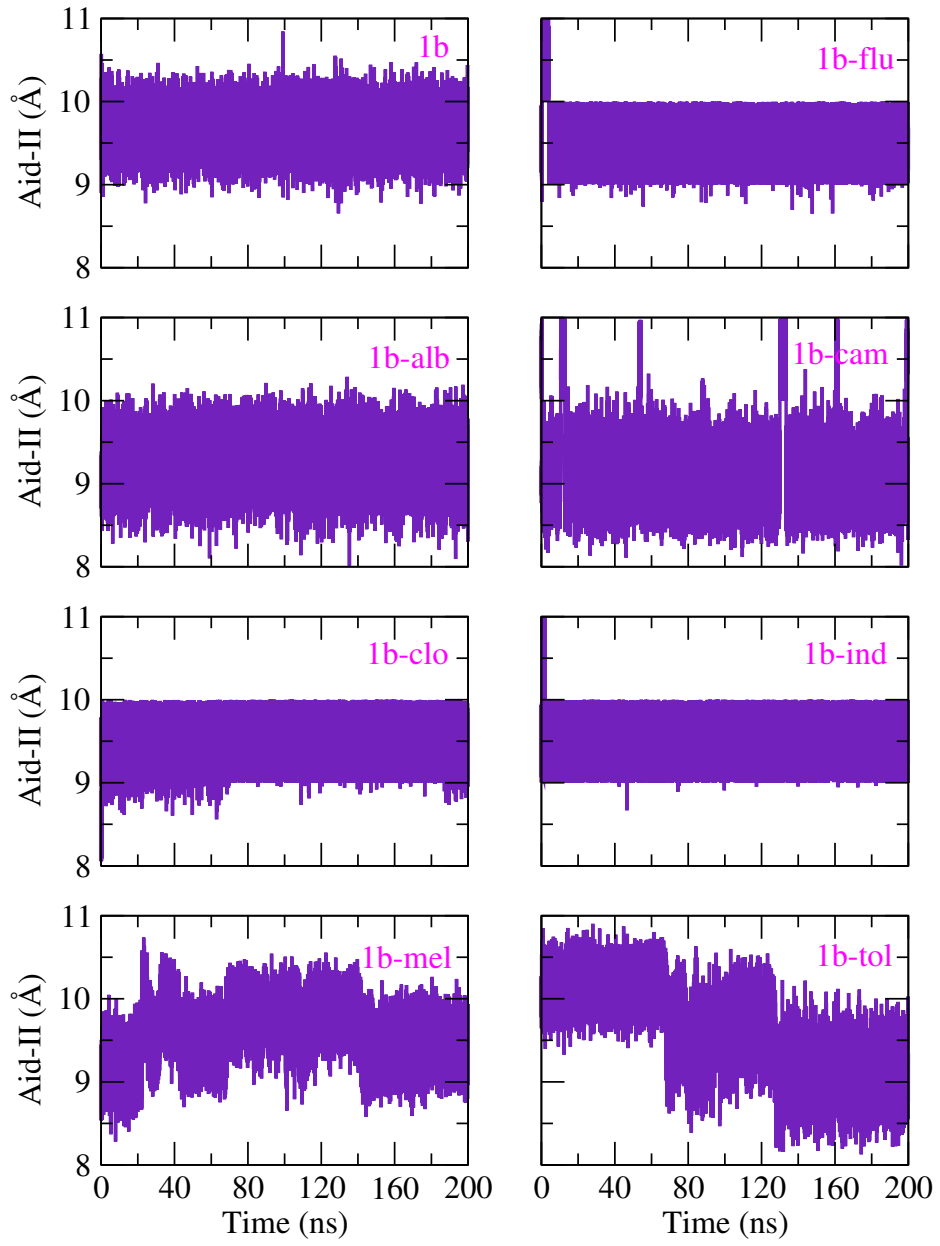

FIG. S4: Diameter-II (Aid-II) of host-1b as a function of simulation time of all the systems.

TABLE S1: Partial charges of all the atomic sites of the fluorouracil drug molecule.  $e$  is the elementary charge.

| Fluorouracil |            |      |            |
|--------------|------------|------|------------|
| Atom         | Charge (e) | Atom | Charge (e) |
| C1           | 0.7874     | C2   | 0.0703     |
| N7           | -0.6750    | F9   | -0.2015    |
| C4           | 0.8568     | C3   | -0.0721    |
| O11          | -0.6462    | H12  | 0.2305     |
| H5           | 0.3937     | N6   | -0.5375    |
| O8           | -0.5912    | H10  | 0.3848     |

TABLE S2: Partial charges of all the atomic sites of the albendazole drug molecule.  $e$  is the elementary charge.

| Albendazole   |            |               |            |
|---------------|------------|---------------|------------|
| Atom          | Charge (e) | Atom          | Charge (e) |
| N4            | -0.7675    | S1            | -0.3095    |
| C12           | 1.0687     | C20           | -0.1676    |
| N5            | -0.8007    | H21, H22      | 0.0716     |
| N6            | -1.0461    | C23           | 0.3594     |
| C14           | 1.2086     | H24, H25      | -0.0647    |
| O2            | -0.4316    | C26           | -0.1721    |
| C30           | -0.1089    | H27, H28, H29 | 0.0353     |
| H31, H32, H33 | 0.1155     | H15           | 0.1782     |
| O3            | -0.7352    | C8            | 0.4166     |
| H19           | 0.4484     | C11           | -0.3531    |
| H16           | 0.5054     | H17           | 0.2244     |
| C7            | 0.1115     | C13           | -0.2315    |
| C10           | -0.2334    | H18           | 0.1727     |
| C9            | 0.1970     |               |            |

TABLE S3: Partial charges of all the atomic sites of the camptothecin drug molecule.  $e$  is the elementary charge.

| Camptothecin |            |               |            |
|--------------|------------|---------------|------------|
| Atom         | Charge (e) | Atom          | Charge (e) |
| C11          | 0.0154     | H40, H41, H42 | 0.0748     |
| N5           | -0.1692    | H27           | 0.2444     |
| C9           | 0.0816     | C14           | 0.5157     |
| C12          | -0.4140    | N6            | -0.7053    |
| C8           | 0.1328     | H25, H26      | 0.1131     |
| C7           | 0.2674     | C13           | -0.1683    |
| O2           | -0.6703    | C18           | -0.2131    |
| H30          | 0.4347     | H29           | 0.2028     |
| C17          | 0.7466     | C19           | -0.0118    |
| O1           | -0.4773    | C21           | -0.2147    |
| C16          | 0.2255     | C23           | -0.1868    |
| C10          | -0.2387    | H33           | 0.1663     |
| C15          | 0.6393     | H31           | 0.1652     |
| O3           | -0.6783    | C20           | 0.6009     |
| H28, H35     | 0.0716     | C22           | -0.3669    |
| O4           | -0.6013    | H32           | 0.2017     |
| C36          | 0.0975     | C24           | -0.0957    |
| H37, H38     | -0.0065    | H34           | 0.1561     |
| C39          | -0.2629    |               |            |



TABLE S4: Partial charges of all the atomic sites of the clopidogrel drug molecule.  $e$  is the elementary charge.

| Clopidogrel |            |               |            |
|-------------|------------|---------------|------------|
| Atom        | Charge (e) | Atom          | Charge (e) |
| N5          | -0.0593    | O3            | -0.3669    |
| C6          | -0.4245    | C21           | -0.1299    |
| C9          | 0.0941     | H28, H36, H37 | 0.1118     |
| C11         | -0.1573    | O4            | -0.6146    |
| S2          | -0.0526    | H35           | 0.1719     |
| C15         | -0.2011    | C12           | 0.4159     |
| C13         | -0.4434    | C17           | -0.3234    |
| C10         | 0.3733     | C19           | -0.0939    |
| C7          | -0.3412    | H26           | 0.1524     |
| H33, H34    | 0.1488     | H24           | 0.1723     |
| H22         | 0.2220     | C16           | -0.1636    |
| H23         | 0.2347     | C11           | -0.1010    |
| H29, H30    | 0.0631     | C18           | -0.0141    |
| H31, H32    | 0.1768     | H25           | 0.1329     |
| C8          | -0.4118    | C20           | -0.2603    |
| C14         | 0.9012     | H27           | 0.1757     |

TABLE S5: Partial charges of all the atomic sites of the indomethacin drug molecule.  $e$  is the elementary charge.

| Indomethacin  |            |               |            |
|---------------|------------|---------------|------------|
| Atom          | Charge (e) | Atom          | Charge (e) |
| O3            | -0.5671    | C25           | 0.0418     |
| C15           | 0.9159     | H36, H37, H41 | 0.0549     |
| N6            | -0.4466    | C17           | -0.2333    |
| C9            | 0.2449     | C13           | -0.3535    |
| C8            | 0.1174     | H29           | 0.2182     |
| C7            | -0.3357    | H32           | 0.2020     |
| C10           | 0.2542     | H28           | 0.2214     |
| C14           | -0.2909    | C18           | -0.3199    |
| H30, H31, H39 | 0.1064     | C21           | -0.0516    |
| C11           | 0.0204     | C23           | -0.0654    |
| C19           | 0.8856     | H35           | 0.1322     |
| O4            | -0.7404    | H33           | 0.1262     |
| H38           | 0.4777     | C20           | -0.0516    |
| O5            | -0.6323    | H40           | 0.1262     |
| H26, H27      | 0.0478     | C22           | -0.0654    |
| C12           | -0.3541    | H34           | 0.1322     |
| C16           | 0.3285     | C24           | 0.0013     |
| O2            | -0.4145    | C11           | -0.1029    |

TABLE S6: Partial charges of all the atomic sites of the melphalan drug molecule.  $e$  is the elementary charge.

| Melphalan |            |          |            |
|-----------|------------|----------|------------|
| Atom      | Charge (e) | Atom     | Charge (e) |
| N5        | -0.1862    | C11      | 0.6896     |
| C9        | -0.2840    | C18      | 0.6256     |
| C16       | -0.2445    | O3       | -0.7339    |
| Cl1       | -0.1873    | H31      | 0.5043     |
| H28, H29  | 0.1888     | O4       | -0.5886    |
| H20, H21  | 0.1860     | H34      | -0.0027    |
| C10       | -0.2840    | N35      | -1.0242    |
| C17       | -0.2445    | H36, H37 | 0.3750     |
| Cl2       | -0.1873    | H19, H33 | 0.2200     |
| H30, H32  | 0.1888     | H27      | 0.1918     |
| H22, H23  | 0.1860     | H24, H25 | 0.2431     |
| C6        | 0.3352     | C12      | -0.3403    |
| C13       | -0.3403    | C7       | -0.8721    |
| C15       | -0.3703    | C14      | -0.3703    |
| C8        | 0.5470     | H26      | 0.1918     |

TABLE S7: Partial charges of all the atomic sites of the tolfenamic acid drug molecule.  $e$  is the elementary charge.

| Tolfenamic acid |            |               |            |
|-----------------|------------|---------------|------------|
| Atom            | Charge (e) | Atom          | Charge (e) |
| N4              | -0.9493    | O3            | -0.6179    |
| C6              | 0.7531     | H17           | 0.4820     |
| C7              | -0.4953    | C5            | 0.2579     |
| C13             | -0.0102    | C30           | 0.2876     |
| C15             | -0.3774    | C9            | -0.1587    |
| C14             | 0.0465     | C11           | -0.0986    |
| C10             | -0.4551    | C26           | -0.3754    |
| H19             | 0.1850     | H27, H28, H29 | 0.1167     |
| H23             | 0.1428     | C8            | -0.1918    |
| H24             | 0.1837     | H18           | 0.1795     |
| H22             | 0.1513     | C11           | -0.2676    |
| C16             | 0.9141     | H20           | 0.1863     |
| O2              | -0.6397    | C12           | -0.0479    |
| H25             | 0.4166     | H21           | 0.1483     |

TABLE S8: Descriptions of all the randomly packed systems used for this work.  $N_{\text{host}}$  is the numbers of the host,  $N_{\text{NH}_4^+}$  is the numbers of the ammonium ion,  $N_{\text{drug}}$  is the numbers of the drug molecules, and  $N_{\text{wat}}$  is the number of water molecules. The molar concentration of the host molecule is represented by  $M_{\text{host}}$ . Host-1a and host-1b are represented by 1a and 1b, respectively. 1a-cam-ran, 1b-clo-ran, etc., is the systems of host-1a and host-1b with the drug cam, clo respectively, etc. These systems with the ‘ran’ terms created by randomly packed the drug molecule inside the simulation box.

| System     | $N_{\text{host}}$ | $N_{\text{NH}_4^+}$ | $N_{\text{drug}}$ | $N_{\text{wat}}$ | Box volume (nm <sup>3</sup> ) | $M_{\text{host}}$ (M) |
|------------|-------------------|---------------------|-------------------|------------------|-------------------------------|-----------------------|
| 1a-flu-ran | 1                 | 4                   | 1                 | 5079             | 156.63                        | 0.0106                |
| 1a-alb-ran | 1                 | 4                   | 1                 | 5617             | 175.03                        | 0.0095                |
| 1a-cam-ran | 1                 | 4                   | 1                 | 5343             | 163.60                        | 0.0107                |
| 1a-clo-ran | 1                 | 4                   | 1                 | 5411             | 169.23                        | 0.0098                |
| 1a-ind-ran | 1                 | 4                   | 1                 | 5979             | 186.98                        | 0.0089                |
| 1a-mel-ran | 1                 | 4                   | 1                 | 5616             | 174.98                        | 0.0095                |
| 1a-tol-ran | 1                 | 4                   | 1                 | 5558             | 171.54                        | 0.0098                |
| 1b-flu-ran | 1                 | 4                   | 1                 | 5596             | 172.26                        | 0.0096                |
| 1b-alb-ran | 1                 | 4                   | 1                 | 5643             | 175.43                        | 0.0095                |
| 1b-cam-ran | 1                 | 4                   | 1                 | 5338             | 163.61                        | 0.0101                |
| 1b-clo-ran | 1                 | 4                   | 1                 | 5498             | 171.72                        | 0.0097                |
| 1b-ind-ran | 1                 | 4                   | 1                 | 5431             | 170.72                        | 0.0097                |
| 1b-mel-ran | 1                 | 4                   | 1                 | 5416             | 169.22                        | 0.0098                |
| 1b-tol-ran | 1                 | 4                   | 1                 | 5264             | 164.53                        | 0.0101                |

\* Electronic address: sandipp@iitg.ac.in
